# Supplementary material for: Glial activation colocalizes with structural abnormalities in amyotrophic lateral sclerosis
Source: PubMed Central journal article supplement — Neurology. 2016 Dec 13;87(24):2554–61. doi: 10.1212/WNL.0000000000003427 (PMC5207001; doi:10.1212/wnl.0000000000003427), 2016-12-13
Supplement: supp_WNL.0000000000003427_Table_e-1.pdf [file supp_WNL.0000000000003427_Table_e-1.pdf]

**Table e-1:**

| <b>Table e-1<br/>MRI acquisition parameters</b>                                                                                                                                                               |               |                        |
|---------------------------------------------------------------------------------------------------------------------------------------------------------------------------------------------------------------|---------------|------------------------|
| <b>Acquisition parameters</b>                                                                                                                                                                                 | <b>DWI</b>    | <b>MEMPRAGE</b>        |
| Isotropic resolution (mm)                                                                                                                                                                                     | 2.5           | 1.0                    |
| Matrix dimension                                                                                                                                                                                              | 88 x 88 x 48  | 280 x 280 x 208        |
| TR (msec)                                                                                                                                                                                                     | 8000          | 2530                   |
| TE (msec)                                                                                                                                                                                                     | 112           | 1.63, 3.49, 5.35, 7.21 |
| TI (msec)                                                                                                                                                                                                     | -1            | 1200                   |
| Flip angle                                                                                                                                                                                                    | 90.00 degrees | 7.00                   |
| FOV                                                                                                                                                                                                           | 220           | 280                    |
| Orientation of slices                                                                                                                                                                                         | LAS           | PSL                    |
| Abbreviations: DWI = Diffusion weighted imaging; MEMPRAGE= Multi-echo magnetization prepared rapid acquisition gradient echo; FOV = field of view; TR = Repetition time; TE = Echo time; TI = Inversion Time; |               |                        |
