# Supplementary material for: Glial activation colocalizes with structural abnormalities in amyotrophic lateral sclerosis
Source: PubMed Central journal article supplement — Neurology. 2016 Dec 13;87(24):2554–61. doi: 10.1212/WNL.0000000000003427 (PMC5207001; doi:10.1212/wnl.0000000000003427), 2016-12-13
Supplement: supp_WNL.0000000000003427_Table_e-2.pdf [file supp_WNL.0000000000003427_Table_e-2.pdf]

Table e-2.

| <b>Table e-2</b>                                             |                              |          |          |                |                |
|--------------------------------------------------------------|------------------------------|----------|----------|----------------|----------------|
| <b>Tracts showing significant decreased FA in ALS vs. HC</b> |                              |          |          |                |                |
| <b>White matter tract</b>                                    | <b>MNI atlas coordinates</b> |          |          | <b>P value</b> | <b>#Voxels</b> |
|                                                              | <b>x</b>                     | <b>y</b> | <b>z</b> |                |                |
| <b>Left Corticospinal tract</b>                              | -14                          | -21      | 63       | 0.008*         | 1204           |
| <b>Right Inferior longitudinal fasciculus</b>                | 45                           | -17      | -16      | 0.025*         | 64             |
| <b>Right Corticospinal tract</b>                             | 22                           | -20      | 38       | 0.036*         | 48             |
| <b>Left Superior longitudinal fasciculus</b>                 | -43                          | -11      | 26       | 0.042*         | 32             |
| <b>Right Corticospinal tract</b>                             | 22                           | -15      | -4       | 0.044*         | 15             |
| <b>Right inferior fronto-occipital fasciculus</b>            | 33                           | -12      | 3        | 0.038*         | 7              |
| <b>Left Superior longitudinal fasciculus</b>                 | -32                          | -7       | 10       | 0.038*         | 5              |
| <b>Left Corticospinal tract</b>                              | -13                          | -40      | 64       | 0.047*         | 2              |
| <b>Left Superior longitudinal fasciculus</b>                 | -32                          | -11      | 6        | 0.038*         | 2              |
| <b>Right Corticospinal tract</b>                             | 20                           | -15      | -5       | 0.048*         | 2              |
| <b>Left Superior longitudinal fasciculus</b>                 | -37                          | -12      | 31       | 0.05*          | 1              |
| <b>Left Superior longitudinal fasciculus</b>                 | -41                          | -13      | 27       | 0.05*          | 1              |

Abbreviations: ALS = amyotrophic lateral sclerosis; HC = healthy control; FA = fractional anisotropy; MNI = Montreal Neurological Institute  
\* (P<0.05 corrected for multiple comparisons)
