# Supplementary material for: Glial activation colocalizes with structural abnormalities in amyotrophic lateral sclerosis
Source: PubMed Central journal article supplement — Neurology. 2016 Dec 13;87(24):2554–61. doi: 10.1212/WNL.0000000000003427 (PMC5207001; doi:10.1212/wnl.0000000000003427), 2016-12-13
Supplement: supp_WNL.0000000000003427_Table_e-3.pdf [file supp_WNL.0000000000003427_Table_e-3.pdf]

**Table e-3**

| <b>Table e-3</b>                                                                                                                                                                                                                                                                                                                                                                                                                       |                    |                                              |                                              |                        |                            |
|----------------------------------------------------------------------------------------------------------------------------------------------------------------------------------------------------------------------------------------------------------------------------------------------------------------------------------------------------------------------------------------------------------------------------------------|--------------------|----------------------------------------------|----------------------------------------------|------------------------|----------------------------|
| <b>Local tractography and PET results in the corticospinal tracts (CST)</b>                                                                                                                                                                                                                                                                                                                                                            |                    |                                              |                                              |                        |                            |
| <b>Method</b>                                                                                                                                                                                                                                                                                                                                                                                                                          | <b>Measurement</b> | <b>ALS</b>                                   | <b>HC</b>                                    | <b>p value, t test</b> | <b>ES Cohen d (95% CI)</b> |
| <b>Left CST</b>                                                                                                                                                                                                                                                                                                                                                                                                                        | <b>FA</b>          | 0.37 (0.064)                                 | 0.45 (0.016)                                 | 0.005*                 | 1.53 (0.39 – 2.67)         |
|                                                                                                                                                                                                                                                                                                                                                                                                                                        | <b>MD</b>          | 7.6X10 <sup>-4</sup> (7.1X10 <sup>-5</sup> ) | 7.3X10 <sup>-4</sup> (7.9X10 <sup>-5</sup> ) | 0.45                   | -0.40 (-1.42 – 0.61)       |
|                                                                                                                                                                                                                                                                                                                                                                                                                                        | <b>AD</b>          | 8.5X10 <sup>-4</sup> (8.3X10 <sup>-5</sup> ) | 8.1X10 <sup>-4</sup> (5.3X10 <sup>-5</sup> ) | 0.23                   | -0.54 (-1.57 – 0.48)       |
|                                                                                                                                                                                                                                                                                                                                                                                                                                        | <b>RD</b>          | 7.2X10 <sup>-4</sup> (6.9X10 <sup>-5</sup> ) | 6.7X10 <sup>-4</sup> (4.6X10 <sup>-5</sup> ) | 0.21                   | -0.80 (-1.86 – 0.24)       |
|                                                                                                                                                                                                                                                                                                                                                                                                                                        | <b>SUVR</b>        | 0.94 (0.1)                                   | 0.81 (0.078)                                 | 0.01*                  | -1.40 (-2.52 - -0.27)      |
| <b>Right CST</b>                                                                                                                                                                                                                                                                                                                                                                                                                       | <b>FA</b>          | 0.37 (0.063)                                 | 0.39 (0.048)                                 | 0.02*                  | 0.35 (-0.52 - 1.24)        |
|                                                                                                                                                                                                                                                                                                                                                                                                                                        | <b>MD</b>          | 7.4X10 <sup>-4</sup> (5.9X10 <sup>-5</sup> ) | 7.3X10 <sup>-4</sup> (7.1X10 <sup>-5</sup> ) | 0.87                   | -0.15 (-1.17 - - 0.85)     |
|                                                                                                                                                                                                                                                                                                                                                                                                                                        | <b>AD</b>          | 8.7X10 <sup>-4</sup> (7.5X10 <sup>-5</sup> ) | 8.0X10 <sup>-4</sup> (3.9X10 <sup>-5</sup> ) | 0.11                   | -1.08 (-2.16 - 0.006)      |
|                                                                                                                                                                                                                                                                                                                                                                                                                                        | <b>RD</b>          | 7.1X10 <sup>-4</sup> (6.3X10 <sup>-5</sup> ) | 6.6X10 <sup>-4</sup> (2.5X10 <sup>-5</sup> ) | 0.15                   | -0.94 (-2.0 – 0.1)         |
|                                                                                                                                                                                                                                                                                                                                                                                                                                        | <b>SUVR</b>        | 0.95 (0.079)                                 | 0.92 (0.054)                                 | 0.41                   | -0.44 (-1.33 – 0.44)       |
| Abbreviations: ALS = amyotrophic lateral sclerosis; HC = healthy control; FA = fractional anisotropy; MD = mean diffusivity; AD = axial diffusivity; RD = radial diffusivity; SUVR = [ <sup>11</sup> C]-PBR28 standardized uptake value normalized by whole brain mean; CST = cortico spinal tract; CI = Confidence Interval; ES = effect size<br>Values are mean (SD)<br>*Significant difference between the groups at ( $p < 0.05$ ) |                    |                                              |                                              |                        |                            |
